# Supplementary material
Source: MDPI journal article supplement (https://www.mdpi.com/2227-9040/11/7/402)
Supplement: s1 [file s1]

**Table S1.** The bond length changes of SF<sub>6</sub> molecules after adsorption.

| Covalent bond | Bond length before adsorption (Å) | Bond length after adsorption (Å) | Variable quantity (Å) |
|---------------|-----------------------------------|----------------------------------|-----------------------|
| S(1) - F(1)   | 1.581                             | 1.57736                          | -0.00364              |
| S(1) - F(2)   | 1.581                             | 1.57412                          | -0.00688              |
| S(1) - F(3)   | 1.581                             | 1.59365                          | 0.01265               |
| S(1) - F(4)   | 1.581                             | 1.59342                          | 0.01242               |
| S(1) - F(5)   | 1.581                             | 1.57721                          | 0.00379               |
| S(1) - F(6)   | 1.581                             | 1.57991                          | -0.00109              |

**Table S2.** The bond angle changes of SF<sub>6</sub> molecules after adsorption.

| Bond angle         | Before adsorption (°) | After adsorption (°) | Variable quantity (°) |
|--------------------|-----------------------|----------------------|-----------------------|
| F(1) - S(1) - F(2) | 90.00                 | 90.2946              | 0.2946                |
| F(1) - S(1) - F(3) | 90.00                 | 90.1272              | 0.1272                |
| F(1) - S(1) - F(4) | 180.00                | 179.3257             | -0.6743               |
| F(1) - S(1) - F(5) | 90.00                 | 90.5797              | 0.5797                |
| F(1) - S(1) - F(6) | 90.00                 | 89.8415              | -0.1585               |
| F(2) - S(1) - F(3) | 180.00                | 178.8050             | -1.1950               |
| F(2) - S(1) - F(4) | 90.00                 | 90.2133              | 0.2133                |
| F(2) - S(1) - F(5) | 90.00                 | 90.2800              | 0.2800                |
| F(2) - S(1) - F(6) | 90.00                 | 90.2171              | 0.2171                |
| F(3) - S(1) - F(4) | 90.00                 | 89.3615              | -0.6385               |
| F(3) - S(1) - F(5) | 90.00                 | 88.3615              | -0.6385               |
| F(3) - S(1) - F(6) | 90.00                 | 89.3350              | -0.6650               |
| F(4) - S(1) - F(5) | 90.00                 | 89.8613              | -0.1387               |
| F(4) - S(1) - F(6) | 90.00                 | 89.7130              | -0.2870               |
| F(5) - S(1) - F(6) | 180.00                | 179.3468             | -0.6532               |

**Table S3.** The bond length changes of CF<sub>4</sub> molecules after adsorption.

| Covalent bond | Bond length before adsorption (Å) | Bond length after adsorption (Å) | Variable quantity (Å) |
|---------------|-----------------------------------|----------------------------------|-----------------------|
| C(1) - F(1)   | 1.316                             | 1.31369                          | -0.00231              |
| C(1) - F(2)   | 1.316                             | 1.32503                          | 0.00903               |
| C(1) - F(3)   | 1.316                             | 1.32504                          | 0.00904               |
| C(1) - F(4)   | 1.316                             | 1.30540                          | -0.01060              |

**Table S4.** The bond angle changes of CF<sub>4</sub> molecules after adsorption.

| Bond angle         | Before adsorption (°) | After adsorption (°) | Variable quantity (°) |
|--------------------|-----------------------|----------------------|-----------------------|
| F(1) - C(1) - F(2) | 109.47                | 108.7871             | -0.6829               |
| F(1) - C(1) - F(3) | 109.47                | 108.8117             | -0.6583               |
| F(1) - C(1) - F(4) | 109.47                | 109.9602             | 0.4902                |
| F(2) - C(1) - F(3) | 109.47                | 108.9077             | -0.5623               |
| F(2) - C(1) - F(4) | 109.47                | 110.1150             | 0.6450                |
| F(3) - C(1) - F(4) | 109.47                | 110.1830             | 0.7130                |

**Table S5.** The bond length changes of CS<sub>2</sub> molecules after adsorption.

| Covalent bond | Bond length before adsorption (Å) | Bond length after adsorption (Å) | Variable quantity (Å) |
|---------------|-----------------------------------|----------------------------------|-----------------------|
| C(1) - S(1)   | 1.5562                            | 1.55659                          | 0.00039               |
| C(1) - S(2)   | 1.5562                            | 1.55650                          | 0.00030               |

**Table S6.** The bond angle changes of CS<sub>2</sub> molecules after adsorption.

| Bond angle         | Before adsorption (°) | After adsorption (°) | Variable quantity (°) |
|--------------------|-----------------------|----------------------|-----------------------|
| S(1) - C(1) - S(2) | 180.00                | 179.9421             | -0.05790              |

**Table S7.** The bond length changes of SO<sub>2</sub> molecules after adsorption.

| Covalent bond | Bond length before adsorption (Å) | Bond length after adsorption (Å) | Variable quantity (Å) |
|---------------|-----------------------------------|----------------------------------|-----------------------|
| S(1) - O(1)   | 1.454                             | 1.4605                           | 0.00650               |
| S(1) - O(2)   | 1.454                             | 1.4605                           | 0.00650               |

**Table S8.** The bond angle changes of SO<sub>2</sub> molecules after adsorption.

| Bond angle         | Before adsorption (°) | After adsorption (°) | Variable quantity (°) |
|--------------------|-----------------------|----------------------|-----------------------|
| O(1) - S(1) - O(2) | 118.59                | 117.5156             | -1.0744               |

**Table S9.** The bond length changes of SO<sub>2</sub>F<sub>2</sub> molecules after adsorption.

| Covalent bond | Bond length before adsorption (Å) | Bond length after adsorption (Å) | Variable quantity (Å) |
|---------------|-----------------------------------|----------------------------------|-----------------------|
| S(1) - F(1)   | 1.575                             | 1.55352                          | -0.02148              |
| S(1) - F(2)   | 1.575                             | 1.55660                          | -0.01840              |
| S(1) - O(1)   | 1.424                             | 1.42192                          | -0.00208              |
| S(1) - O(2)   | 1.424                             | 1.42251                          | -0.00149              |

**Table S10.** The bond angle changes of SO<sub>2</sub>F<sub>2</sub> molecules after adsorption.

| Bond angle         | Before adsorption (°) | After adsorption (°) | Variable quantity (°) |
|--------------------|-----------------------|----------------------|-----------------------|
| F(1) - S(1) - F(2) | 94.8349               | 95.5080              | 0.6731                |
| F(1) - S(1) - O(1) | 107.9328              | 108.1127             | 0.1799                |
| F(1) - S(1) - O(2) | 107.9394              | 108.1244             | 0.1850                |
| F(2) - S(1) - O(1) | 107.9328              | 105.7185             | -2.2143               |
| F(2) - S(1) - O(2) | 107.9394              | 105.6996             | -2.2398               |
| O(1) - S(1) - O(2) | 125.8551              | 128.6210             | 2.7659                |

**Table S11.** The bond length changes of SOF<sub>2</sub> molecules after adsorption.

| Covalent bond | Bond length before adsorption (Å) | Bond length after adsorption (Å) | Variable quantity (Å) |
|---------------|-----------------------------------|----------------------------------|-----------------------|
| S(1) - F(1)   | 1.616                             | 1.6250                           | 0.0090                |
| S(1) - F(2)   | 1.616                             | 1.5900                           | -0.0260               |
| S(1) - O(1)   | 1.437                             | 1.4470                           | 0.0100                |

**Table S12.** The bond angle changes of SOF<sub>2</sub> molecules after adsorption.

| <b>Bond angle</b>  | <b>Before adsorption (°)</b> | <b>After adsorption (°)</b> | <b>Variable quantity (°)</b> |
|--------------------|------------------------------|-----------------------------|------------------------------|
| F(1) - S(1) - F(2) | 92.64                        | 94.27                       | 1.6300                       |
| F(1) - S(1) - O(1) | 106.71                       | 108.17                      | 1.4600                       |
| F(2) - S(1) - O(1) | 106.71                       | 106.13                      | -0.5800                      |
